# Supplementary material for: Facile synthesis of hybrid graphene and carbon nanotubes as a metal-free electrocatalyst with active dual interfaces for efficient oxygen reduction reaction
Source: Royal Society of Chemistry journal article supplement (doi:10.1039/c3ta12520c), 2013-01-01
Supplement: c3ta12520c.pdf [file c3ta12520c.pdf]

Electronic Supplementary Information (ESI)

**Facile Synthesis of Hybrid Graphene and Carbon Nanotube as  
Metal-Free Electrocatalyst with Active Dual Interfaces for  
Efficient Oxygen Reduction Reaction**

Jang-Soo Lee,<sup>a†</sup> Kiyoung Jo,<sup>b†</sup> Taemin Lee,<sup>a</sup> Taeyeong Yun,<sup>a</sup> Jaephil Cho,<sup>a\*</sup> and

Byeong-Su Kim<sup>a\*</sup>

<sup>a</sup> Interdisciplinary School of Green Energy and <sup>b</sup> School of Natural Sciences

Ulsan National Institute of Science and Technology (UNIST), Ulsan 689-798, Korea

<sup>†</sup> These authors contributed equally to this work

E-mail: jpcho@unist.ac.kr; bskim19@unist.ac.kr

## Electronic Supplementary Information (ESI)

### 1. Experimental

**Preparation of PDAC functionalized multi-walled carbon nanotubes (pMWNT) and graphene oxide (GO) to synthesize the hybrid rGO/pMWNT electrode.** pMWNT were prepared by following method. 50 mg of MWNT (10 - 15 nm diameter, Hanwha Nanotech Corp.) were mixed with 2 wt. % of poly(diallyldimethylammonium chloride) (PDAC) in 100 mL of water in the presence of 3 wt. % of NaCl. Then, stable pMWNT suspension was prepared by ultrasonication for 1 h.<sup>S3</sup> Graphene oxide (GO) was prepared from a commercial graphite (Aldrich) by modified Hummers method and exfoliated using ultrasonication. The resulting brown solution was mixed with pMWNT suspension at a specific ratio (GO:pMWNT = 0.5:1 - 10:1). GO in a mixed solution was reduced into reduced graphene oxide (rGO) by adding hydrazine (35 wt. % in water, Aldrich) followed by heating at 100 °C for 2 hours. Finally, the suspension of rGO/pMWNT was filtered by Nylon membrane filter (pore size of 0.2 μm, Corning) and redispersed at a concentration of 0.50 mg/mL of rGO. rGO sheets were stabilized by PDAC functionalization to prevent restacking. PDAC Functionalized rGO was written as rGO for simple notation.

**Preparation of rGO, pMWNT and rGO/pMWNT<sub>(0.5:1)</sub> thin films for contact angle measurement.** rGO, pMWNT and rGO/pMWNT<sub>(0.5:1)</sub> solutions were filtered with anodic aluminum oxide (AAO) membrane. After several times washing with deionized water, uniform films were formed on the membrane. To measure contact angle, a water droplet was dropped on each film and the contact angle image was captured immediately after forming the contact interface.

**Preparation of catalysts ink and working electrode.** Actual concentrations of each solution were 2.3 mg/ml for rGO, 2.8 mg/ml for pMWNT and 1.5 mg/ml for rGO/pMWNT<sub>(0.5:1)</sub>, respectively. For comparison, 20% Pt on Vulcan XC-72 catalysts (Premetek Co.) ink was prepared by ultrasonically mixing 2 mg of the catalyst powder with 2 mL in distilled water at least 1 h. Then, 6 μL of each solution including Pt/C catalyst was loaded on the polished glassy carbon (GC) electrode of 4 mm diameter (RRDE Pt Ring/GC Disk Electrode, cat. NO. 011162, ALS Co., Ltd.). Corresponding loading densities were 109 μg<sub>Cat</sub>/cm<sup>2</sup> for rGO, 133 μg<sub>Cat</sub>/cm<sup>2</sup> for pMWNT, 71.2 μg<sub>Cat</sub>/cm<sup>2</sup> for rGO/pMWNT<sub>(0.5:1)</sub>, and 20 μg<sub>Pt</sub>/cm<sup>2</sup> for Pt,

### Electronic Supplementary Information (ESI)

respectively. Before applying each catalyst, glassy carbon electrodes were polished with 0.05  $\mu\text{m}$  polishing alumina to maintain a good condition of working electrode (PK-3 Electrode Polishing kit, ALS Co., Ltd.). Catalyst-coated GC electrodes were then dried under vacuum at room temperature for at least 20 min.

**Rotating Ring Disk Electrode (RRDE) experiment.** Rotating ring disk electrode (RRDE) (ALS Co., Ltd) experiments were carried out using the as-prepared catalysts film (deposited on GC electrode) as the working electrode in 0.1 M KOH alkaline electrolyte. Pt wire and SCE are used as a counter and a reference electrode, respectively. Before RRDE test, 0.1 M KOH electrolyte was bubbled with pure oxygen gas (99.9%) for 30 min. Electrochemical characterization was conducted using bi-potentiostat (IviumStat). 10 mV of scan rate was swept from 0.15 to -0.8 V and sufficient ring potential of 0.4 V was biased to oxidize intermediate during ORR. The collection efficiency ( $N$ ) was determined under Ar atmosphere using 10 mM  $\text{K}_3[\text{Fe}(\text{CN})_6]$ , which is around 0.41. This value is very close to its theoretical value of 0.42. Hydrogen peroxide yields and the number of electrons transferred ( $n$ ) were calculated using the equations below. Furthermore, rotating disk electrode (RDE) (ALS Co., Ltd) experiments were carried out under aforementioned condition to construct the Koutecky–Levich plot.

$$H_2O_2(\%) = 100 \frac{2I_r / N}{I_d + I_r / N} \quad (1)$$

$$n = 4 \frac{I_d}{I_d + I_r / N} \quad (2)$$

**Calculating the number of transferred electrons ( $n$ ) of the as-prepared catalysts from the slope of the Koutecky–Levich plot.** Koutecky-Levich plot relates the current density ( $i$ ) to the rotation rate of electrode ( $\omega$ ) and allows one to determine both kinetic current ( $i_k$ ) and number of transferred electrons ( $n$ ) involved in ORR.

$$\frac{1}{i} = \frac{1}{i_k} + \frac{1}{i_{dl}} = \frac{1}{i_k} + \frac{1}{B\omega^{0.5}} \quad (3)$$

### Electronic Supplementary Information (ESI)

$$i_k = nFAkC_{O_2} \text{ (Kinetic current)} \quad (4)$$

$$\begin{aligned} i_{dl} &= 0.62nFAC_{O_2} D_{O_2}^{2/3} \nu^{-1/6} \omega^{1/2} \text{ (Diffusion current)} \quad (5) \\ &= 0.620 \left( \frac{2\pi}{60} \right)^{1/2} nFAC_{O_2} (\omega' = \text{rpm number})^{1/2} D_{O_2}^{2/3} \nu^{-1/6} \\ &= 0.2nFAC_{O_2} (\omega' = \text{rpm number})^{1/2} D_{O_2}^{2/3} \nu^{-1/6} \end{aligned}$$

where  $i_k$  represents the kinetic current;  $i_{dl}$  is diffusion limiting current;  $n$  is the number of electrons transferred per  $O_2$  molecule;  $F$  is the Faraday constant (96485 C/mol);  $A$  is the geometric area of the disk electrode ( $7.06 \times 10^{-6} \text{ m}^2$ );  $k$  (m/s) is the rate constant for the ORR;  $C_{O_2}$  is the saturated concentration of  $O_2$  in solution (1.21 mol/m<sup>3</sup> in 0.10 M KOH);  $\nu$  is the kinematic viscosity ( $1 \times 10^{-6} \text{ m}^2/\text{s}$  in 0.10 M KOH);  $D_{O_2}$  is the diffusion coefficient of  $O_2$  in solution ( $1.87 \times 10^{-9} \text{ m}^2/\text{s}$  in 0.10 M KOH).  $\omega$  and  $\omega'$  are the angular frequency of the rotation (rad/s) and electrode rotation rate in rpm, respectively. 0.2 is a constant when the rotation speed is expressed in rpm. From the linear relationship between  $i^{-1}$  vs  $\omega^{1/2}$  based on the Koutecky-Levich equation, we can obtain the electrons transferred ( $n$ ) from the slope.

Electronic Supplementary Information (ESI)

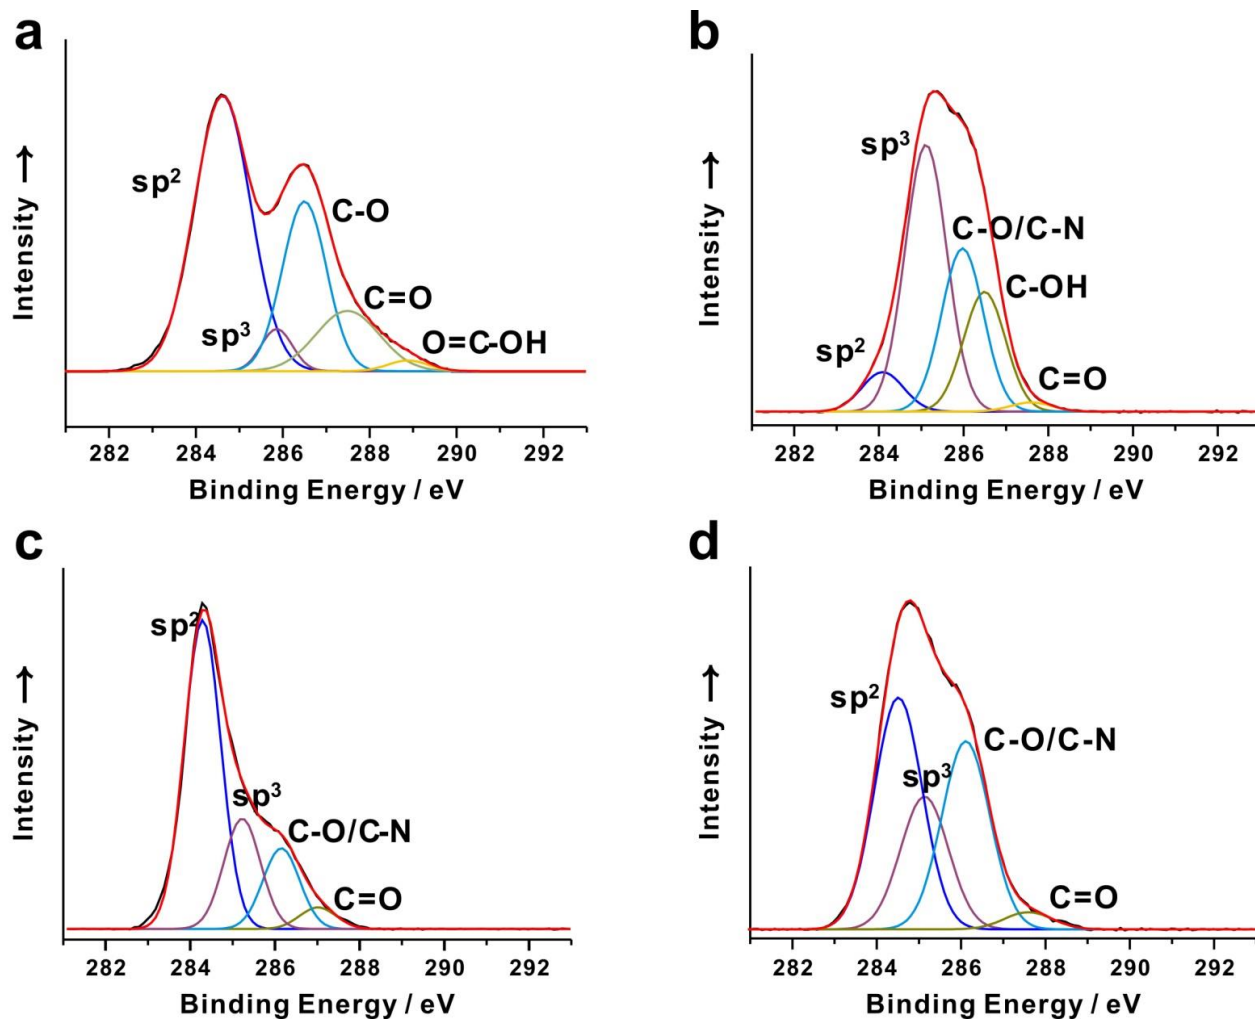

**Fig. S1** High-resolution C 1s XPS spectra of all samples used in the study. (a) GO, (b) pMWNT, (c) rGO/pMWNT<sub>(0.5:1)</sub>, and (d) rGO.

Electronic Supplementary Information (ESI)

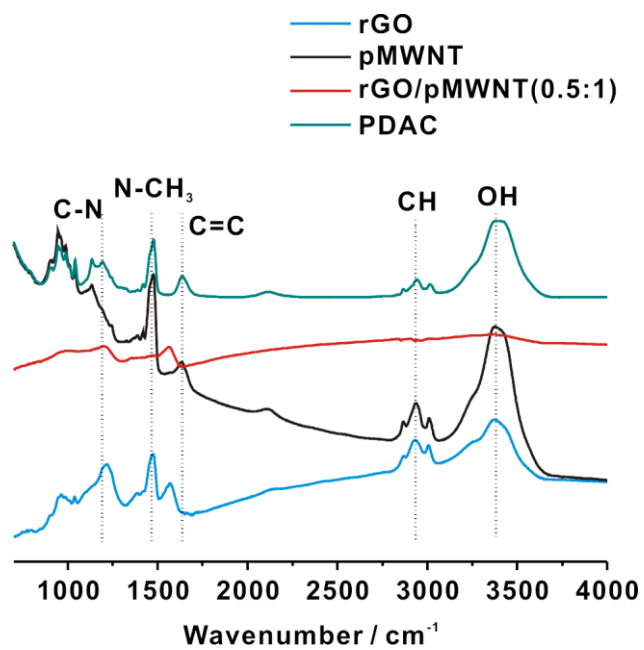

**Fig. S2** FT-IR spectra of rGO, pMWNT, rGO/pMWNT<sub>(0.5:1)</sub>, and pure PDAC. All peaks are assigned with the data of previous literature.<sup>S3</sup>

Electronic Supplementary Information (ESI)

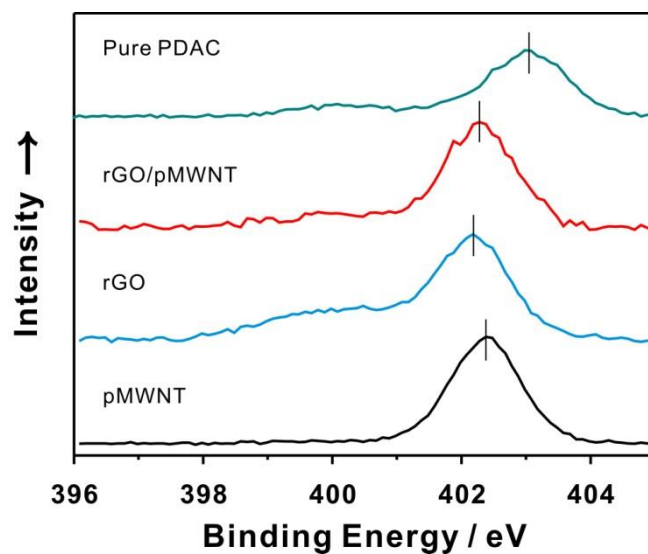

**Fig. S3** High-resolution N 1s XPS spectra of all samples used in the study. Negative shift of N 1s peak from 402 eV (pure PDAC) to 401.5 eV (pMWNT) can be attributed to intermolecular charge-transfer of quaternary ammonium nitrogen.

Electronic Supplementary Information (ESI)

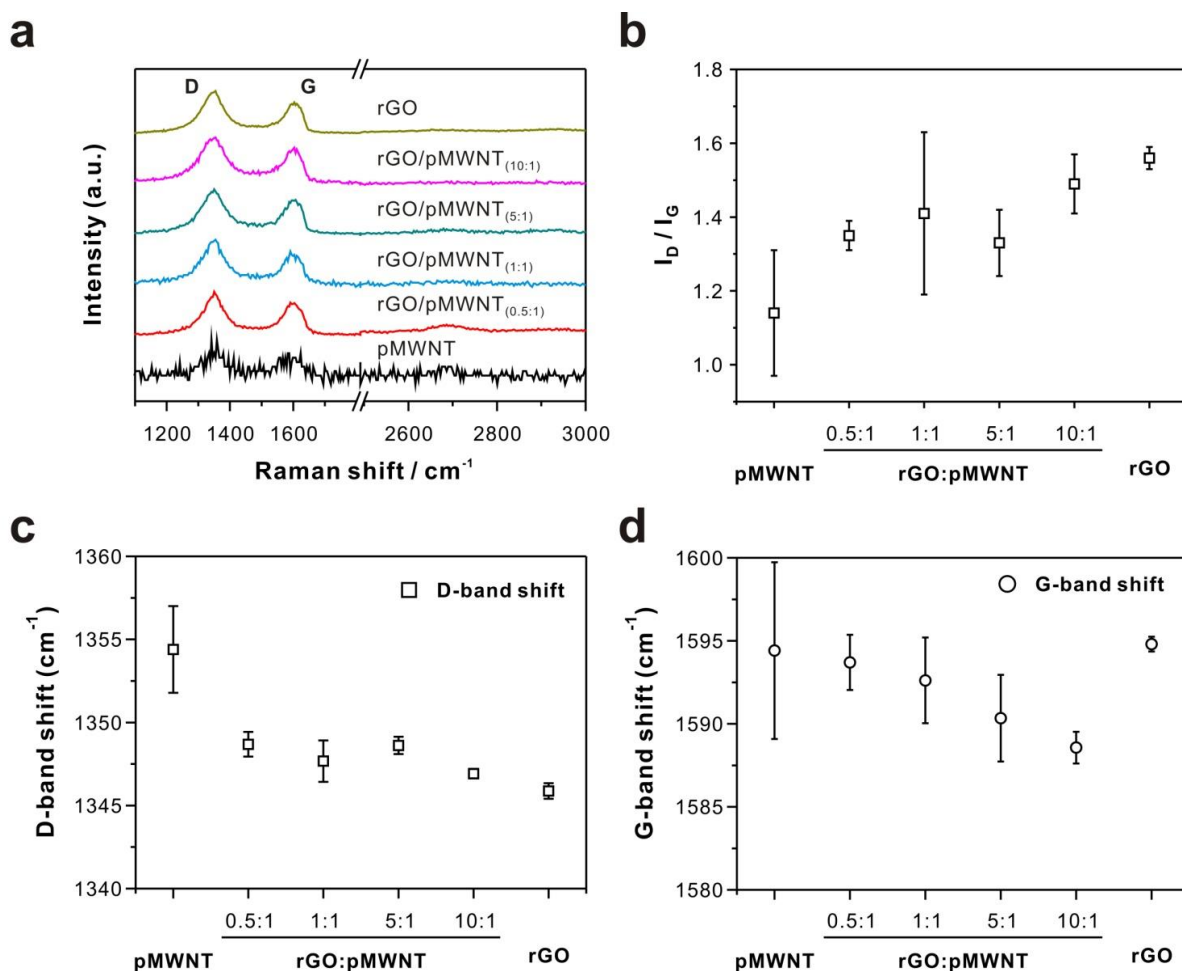

**Fig. S4** (a) Raman spectra of all samples used in the study, (b) ratio of  $I_D/I_G$ , (c) D-band shift, and (d) G-band shift of all samples. The  $I_D/I_G$  ratio increased from 1.14 in pMWNT to 1.35 in rGO/pMWNT<sub>(0.5:1)</sub> and even to 1.49 in rGO/pMWNT<sub>(10:1)</sub>, indicating the disordered graphitic structures of hybrid electrocatalysts upon introduction of rGO into pMWNT. The  $I_D/I_G$  ratio was measured at least 5 different points of each sample. Up-shift of G bands from 1594.2  $\text{cm}^{-1}$  in pMWNT to 1588.6  $\text{cm}^{-1}$  in rGO/pMWNT<sub>(10:1)</sub> illustrated the charge transfer between rGO and pMWNT.



Electronic Supplementary Information (ESI)

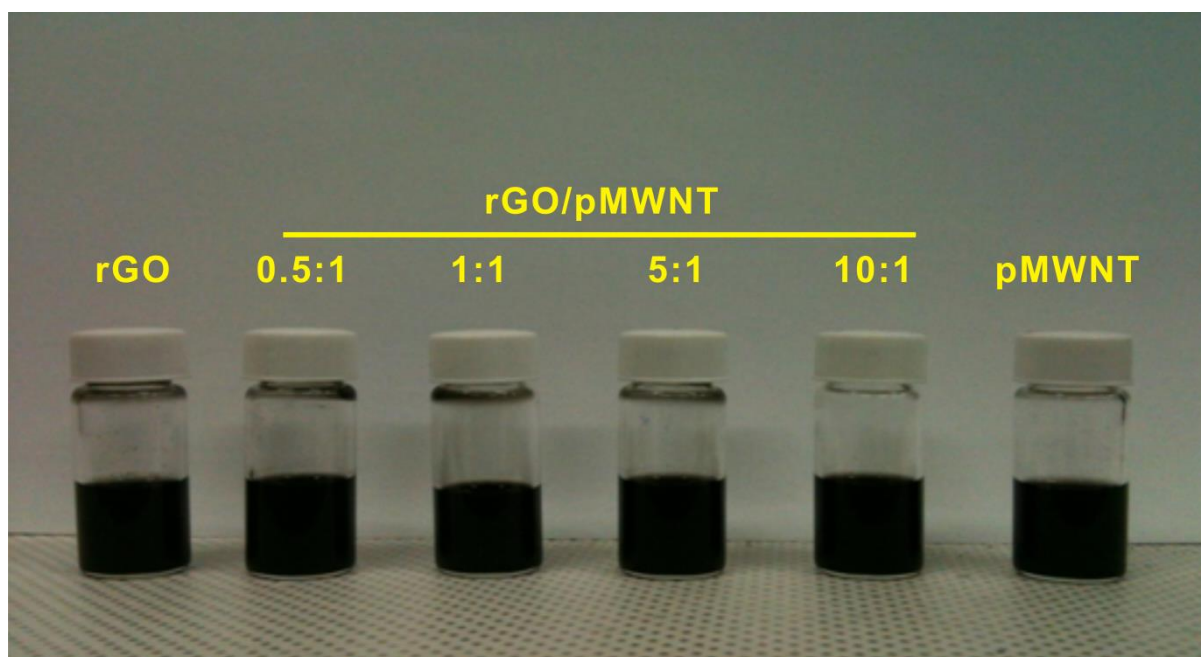

**Fig. S5** Photograph of each suspension prepared in this study at a concentration of 0.50 mg/mL. The stability of the suspension remained over 8 months.

Electronic Supplementary Information (ESI)

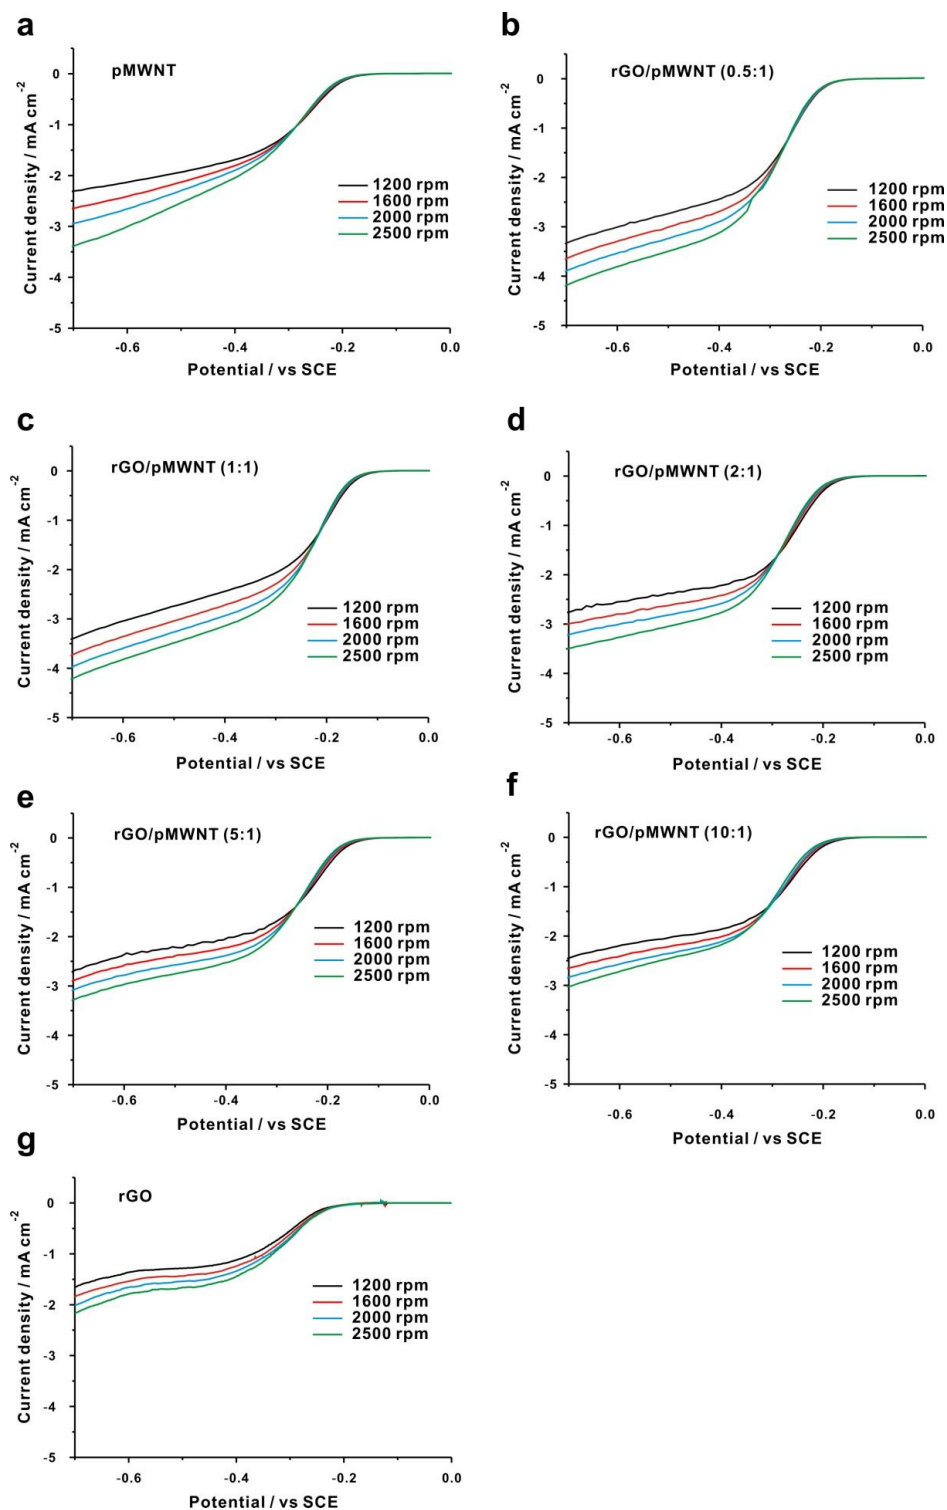

**Fig. S6** Linear sweep voltammetry (LSV) curves of (a) pMWNT, (b) rGO/pMWNT<sub>(0.5:1)</sub>, (c) rGO/pMWNT<sub>(1:1)</sub>, (d) rGO/pMWNT<sub>(2:1)</sub>, (e) rGO/pMWNT<sub>(5:1)</sub>, (f) rGO/pMWNT<sub>(10:1)</sub>, and (g) rGO measured in O<sub>2</sub>-saturated 0.1 M KOH solution.

Electronic Supplementary Information (ESI)

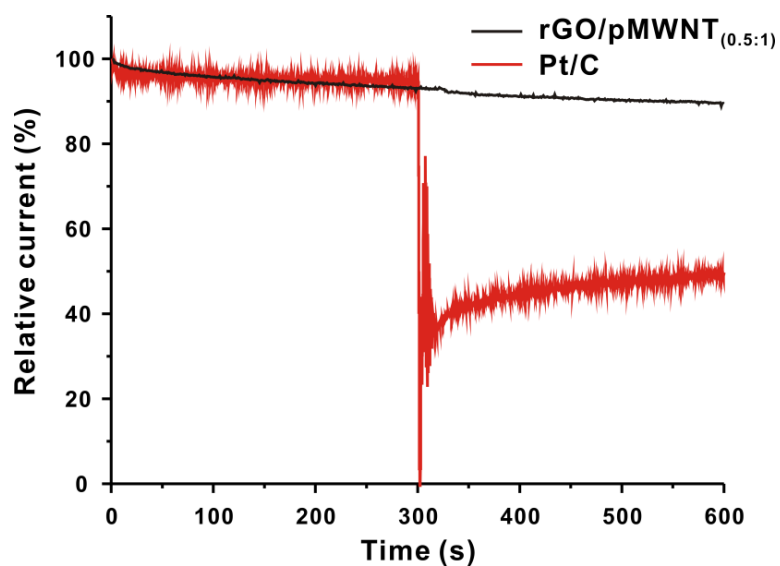

**Fig. S7** Current-time (*i-t*) chronoamperometric response of rGO/pMWNT<sub>(0.5:1)</sub> in O<sub>2</sub>-saturated 0.1 M KOH at -0.4 V (vs. SCE). 3 M of methanol was added at about 300 s to show crossover effect does not occur.

Electronic Supplementary Information (ESI)

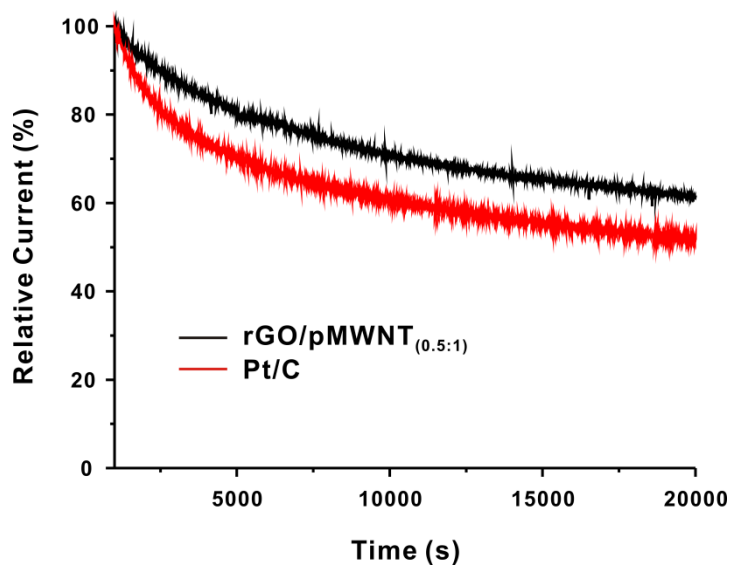

**Fig. S8** The chronoamperometric durability response for 20000 s verified that the rGO/pMWNT<sub>(0.5:1)</sub> composite exhibited a very slow attenuation with high current retention of 61%, a value which is higher than that of Pt/C in the O<sub>2</sub>-saturated 0.1 M KOH solution at -0.25 V (vs. SCE). Electrode rotation rate: 1600 rpm.

Electronic Supplementary Information (ESI)

**Table S1.** ORR Catalytic Activity of Metal-free Catalyst according to method and components

| Hybrid<br>(Components)                                                                              | Procedure<br>(Different<br>Components)                                            | Voltage<br>(vs<br>Reference<br>electrode) | Average<br>Number of<br>Electron<br>Transferred<br>(Procedure) | Reference<br>(Journal/ Year)          |
|-----------------------------------------------------------------------------------------------------|-----------------------------------------------------------------------------------|-------------------------------------------|----------------------------------------------------------------|---------------------------------------|
| Carbon Nitride<br>(Graphene Oxide,<br>Melamine)                                                     | 600 °C Thermal<br>Annealing                                                       | -0.8 V (vs<br>Ag/AgCl)                    | 3.4-3.6                                                        | S1<br>(ACS Nano/ 2011)                |
| N-doped Graphene<br>(Graphene Oxide,<br>Cyanamide)                                                  | 900 °C Thermal<br>Annealing                                                       | -0.8 V (vs<br>Ag/AgCl)                    | 3.54                                                           | S2<br>(ACS Nano/ 2012)                |
| PDAC functionalized<br>CNT<br><br>(CNT, Vertically<br>aligned CNT, PDAC)                            | A. Sonication<br>(CNT)<br><br>B. 950 °C CVD<br>growth (Vertically<br>aligned CNT) | -0.8 V (vs<br>SCE)                        | 3.08 (A)<br>3.72 (B)                                           | S3<br>(J. Am. Chem.<br>Soc./ 2011)    |
| S, N Dual-doped<br>Mesoporous<br>Graphene<br><br>(Graphene Oxide,<br>Melamine, Benzyl<br>disulfide) | 900 °C Thermal<br>Annealing, HF<br>treatment                                      | -0.6 V (vs<br>Ag/AgCl)                    | 3.6                                                            | S4<br>(Angew. Chem.<br>Int. Ed./2012) |
| Macroporous<br>Graphitic Carbon<br>Nitride<br><br>(Carbon shell with<br>Silica, Cyanamide,)         | 900 °C<br>Carbonization                                                           | -0.75 V (vs<br>Ag/AgCl)                   | 3.17                                                           | S5<br>(Angew. Chem.<br>Int. Ed./2012) |
| rGO/pMWNT                                                                                           | <b>Physical mixing</b><br><b>100 °C Reduction</b>                                 | -0.8 V (vs<br>SCE)                        | 3.6                                                            | <b>Our Work</b>                       |

## Electronic Supplementary Information (ESI)

### *References*

- S1. Z.-H. Sheng, L. Shao, J.-J. Chen, W.-J. Bao, F.-B. Wang and X.-H. Xia, *ACS Nano*, 2011, **5**, 4350-4358.
- S2. K. Parvez, S. Yang, Y. Hernandez, A. Winter, A. Turchanin, X. Feng and K. Müllen, *ACS Nano*, 2012, **6**, 9541-9550.
- S3. S. Wang, D. Yu and L. Dai, *J. Am. Chem. Soc.*, 2011, **133**, 5182-5185.
- S4. J. Liang, Y. Jiao, M. Jaroniec and S. Z. Qiao, *Angew. Chem. Int. Ed.*, 2012, **51**, 11496-11500.
- S5. J. Liang, Y. Zheng, J. Chen, J. Liu, D. Hulicova-Jurcakova, M. Jaroniec and S. Z. Qiao, *Angew. Chem. Int. Ed.*, 2012, **51**, 3892-3896.
